# Supplementary material for: An Activation Force-based Affinity Measure for Analyzing Complex Networks
Source: PubMed Central journal article supplement — Sci Rep. 2011 Oct 12;1:113. doi: 10.1038/srep00113 (PMC3216595; doi:10.1038/srep00113), 2011-10-12
Supplement: srep00113-s1.pdf [file srep00113-s1.pdf]

# Supplementary Information for

## *Activation Forces based Affinity Measure*

### *for Analyzing Complex Network*

Jun Guo<sup>1</sup>, Hanliang Guo<sup>2</sup>, Zhanyi Wang<sup>1</sup>

<sup>1</sup>School of Information and Communication Engineering, Beijing University of Posts and Telecommunications

<sup>2</sup>Department of Aerospace and Mechanical Engineering, Viterbi School of Engineering, University of Southern California

## Table of Contents

- 1 Details of the word networks
  - 1.1 Properties of **W**
  - 1.2 The word affinities based on **W**
  - 1.3 A comparison with human free association
- 2 Details of the protein interaction networks
  - 2.1 Properties of **P**
  - 2.2 Statistics of the affinity networks of CAPs and CAPCs
  - 2.3 Software for the computation of the protein affinity network

# 1 Details of the word networks

## 1.1 Properties of $\mathbf{W}$

To construct a  $\mathbf{W}$ , the parameter  $L$ , which controls the maximum distance between two words' occurrences that are considered to be a co-occurrence, should be predetermined. Following previous research, we set  $L = 4, 5$  and  $6$ , computing three sets of co-occurrence counts and average distances for each pair of words in the vocabulary. Based on these data and the occurrence counts of all the words, we computed three  $\mathbf{W}$ s named here  $\mathbf{W}^4$ ,  $\mathbf{W}^5$ , and  $\mathbf{W}^6$ , respectively.

Through the comparison of the elements of the three  $\mathbf{W}$ s, we found that the  $\mathbf{W}$ s have neither significantly different element values, nor different effects in the experiments. We conclude that the  $\mathbf{W}$ s are not sensitive to the parameter  $L$  within a certain range (4-6 words). Therefore, we only gave the result from  $\mathbf{W}^5$  in our main text for saving space. This is also an implication of the robotics of  $\mathbf{W}$ .

In these  $\mathbf{W}$ s, every particular row or column shows a power-law-like distribution. This means that the coding of  $\mathbf{W}$ s can be very sparse. Namely, we can leave out a large number of *wafs* smaller than a threshold  $T$  to represent the word network with a few *wafs* that are strong enough to keep the characteristics of the word network. The remaining *wafs* can be considered as the codes for encoding the word network.

In the major experiment, by discarding the *wafs* smaller than  $T = 1.0\text{e-}6$ , the sparseness of  $\mathbf{W}$ s were enhanced at least over 24 times with a cost of losing less than 3.5% sum amount of *wafs* (Table 1). This was a crucial step making the computation of  $10,044 \times 10,044$  affinities under personal computing environment tractable.

Table 1. The enhancement of sparseness of  $\mathbf{W}$ s

|                | Num. of nonzero <i>wafs</i><br>(before discarding) | Num. of nonzero <i>wafs</i><br>(after discarding) | Sum amount of <i>wafs</i><br>(before discarding) | Sum amount of <i>wafs</i><br>(after discarding) |
|----------------|----------------------------------------------------|---------------------------------------------------|--------------------------------------------------|-------------------------------------------------|
| $\mathbf{W}^4$ | 18,497,240                                         | 773,011                                           | 40.68                                            | 39.42                                           |
| $\mathbf{W}^5$ | 21,244,909                                         | 773,468                                           | 39.94                                            | 38.61                                           |
| $\mathbf{W}^6$ | 23,550,462                                         | 764,879                                           | 39.10                                            | 37.73                                           |

In the main text, we have described the heavy tailed distribution of the *waf* values at each node of the network. What does the distribution of *waf* values over the whole network  $\mathbf{W}^5$  look like? Fig. 1 gives a clear idea that the distribution is a near-perfect one following a power law with an exponent  $k = 1.1$ . The sharp descending of the *waf* values guarantees that the spare coding of the  $\mathbf{W}$ s can achieve a high quality, thereby, the word network can be constituted with distinct local structures.

On the other hand, as shown in Fig. 2, the sparse  $\mathbf{W}^5$  has the typical feature of a complex network that the link numbers of its nodes distribute following a power law. According to our statistical analysis, the occurrence frequency and the link number of a word in the  $\mathbf{W}^5$  are extremely correlated. The correlation coefficients between the frequency and the in-link number, the out-link number, and the total link number are 0.89, 0.91 and 0.92, respectively. These features are completely consistent with the well-known natures of word networks. For the interested readers, the  $\mathbf{W}^5$  is available through contact with the corresponding author.

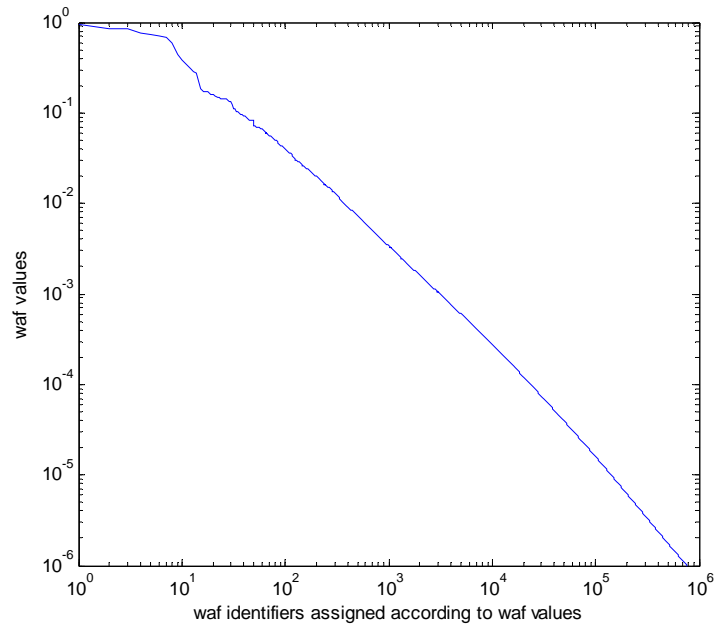

**Figure 1 | The distribution of *waf* values over all *wafs* in the sparse  $W^5$ .** It follows a power law with an exponent  $k = 1.1$ . The biggest 10 *wafs* are: *hong-kong* (0.95), *los-angeles* (0.85), *hewlett-packard* (0.84), *gon-na* (0.77), *sri-lanka* (0.74), *per-cent* (0.71), *ulcerative-colitis* (0.69), *saudi-arabia* (0.59), *et-al* (0.44), and *saddam-hussein* (0.38).

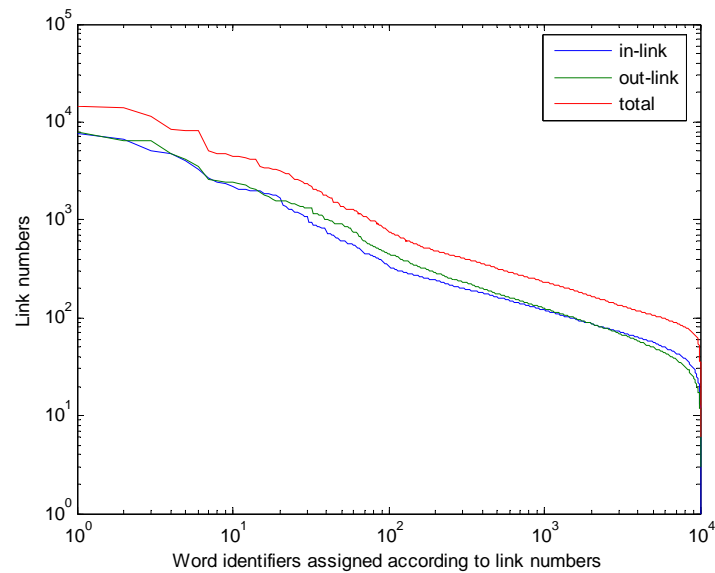

**Figure 2 | The distributions of the link numbers of the sparse  $W^5$ .** The horizontal axis indicates the three sets of word identifiers (No. 1 to No. 10,044) assigned according to in-, out-, and total link numbers, respectively. The figure shows that every distribution of the three follows a power law with the same exponent  $k = 0.6$ . The top 5 in-link intensive words are *and* (7590), *the* (6580), *of* (5051), *in* (4800), and *to* (4076); the top 5 out-link intensive words are *the* (7882), *and* (6460), *of* (6352), *a* (4788), and *to* (4097).

## 1.2 The word affinities based on W

Through a few examples, Fig. 3 shows that by linking a center word and its top 5 neighbours, we easily obtain very meaningful 6-word-clusters, and the local connections of the 6-word-clusters can be striking.

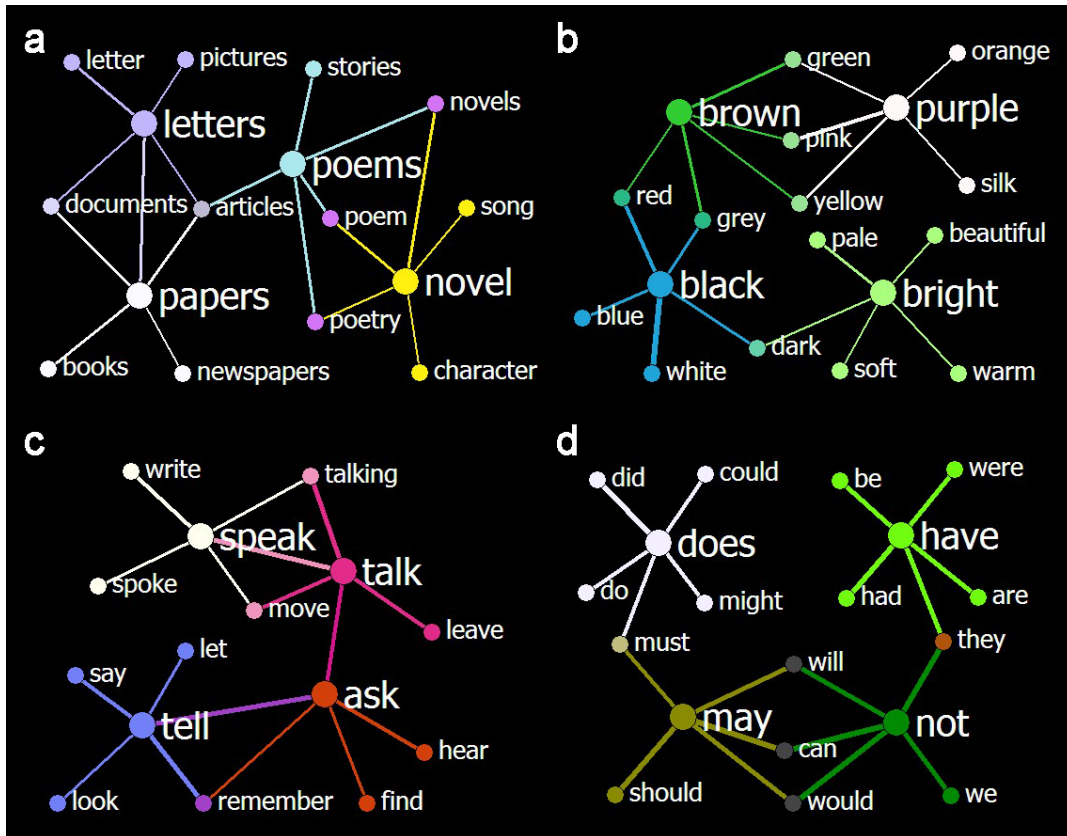

**Figure 3 | 6-word clusters and their local connections identified by  $A^{af}$ .** Center nodes in the clusters are in the bigger size for the eye. The nodes and links belonging to the same cluster are in the same colour except those that are shared by more than one cluster, whose colours are mixed. The thickness of a link represents the affinity between its nodes, ranging from 0.07 (*novel-poetry*) to 0.21 (*have-had*) in this figure. The length of a link means nothing. **a**, Local connections of noun clusters (related to literature). **b**, Adjective-noun clusters (colour). **c**, Verb clusters (talking). **d**, Function word clusters. Besides the plausibility of the clusters and their connections, the strong links between function words are notable.

In addition, Fig. 4 shows a complex sub-network including various hierarchies in the domain of *science and art*. Such a sub-network presents an inherent complex structure of word networks that includes intricate semantic relations.

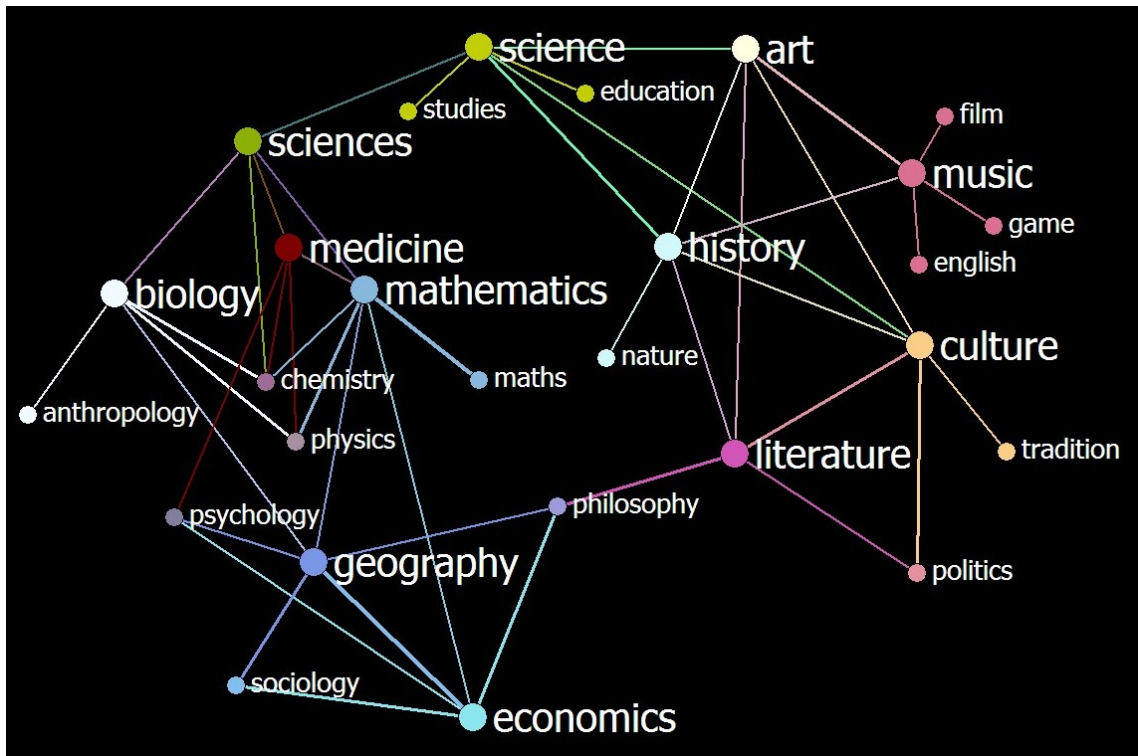

**Figure 4 | A complex sub-network composed by 6-word clusters in the domain of science and art.** The sub-network shows that the affinities between the words are highly sensible, while the hierarchies in the word networks are intricate. In the sub-network, various types of hierarchies are included, for example the vertical hierarchies (*science, sciences, mathematics*; *art, culture, tradition*), the flat hierarchies (*history, culture, literature*; *mathematics, geography, economics*), and the hybrid hierarchies (*art, history, music*; *art, literature, politics*). The affinities range from 0.06 (*medicine-psychology*) to 0.13 (*mathematics-maths*).

### 1.3 A comparison with human free association

Comparing the neighbouring words in our networks and the associated words in manual free association makes more sense. To this end, targeting 3,269 words in our vocabulary which are overlapped by the words used in the free association data set collected by D. L. Nelson, C. L. McEvoy and T. A. Schreiber, <http://w3.usf.edu/FreeAssociation/>, we compare their top 3 neighbours in our network and top 3 associates in the free association. The comparison shows that our results are mostly comparable to the ones of the free association. Table 2 presents a small part of the comparison for the target words of common used nouns and verbs in daily life, and a complete comparison is available in Supplementary Data2. From Table 2, we see that for a big proportion of the target words our network and the free association give common answers, such as for *beer, wine, walk, talk* etc. In total this proportion is some 1/4 (798:3,269). For the rest, although both the neighbours and the associates are sensible, they present respective characters. In contrast to the freedom of the associates in categories, the neighbours are exerted more syntactic constraints, leading to that they are much more consistent in parts of speech while they are occasionally loose in semantics (e.g. for *eat*). Notably, our results are merely based on the BNC, a 100 million word corpus, thereby they are naturally characterized by its specific

contexts for each words which are unnecessarily consistent with common sense. For example, in our network, *apple*'s top three neighbours are *microsoft*, *novell* and *ibm*, it suggests that the word is mainly in the contexts of computer industry rather than daily life in the corpus.

**Table 2. Top 3 neighbours and associates with target words from our network and free association**

| Targets | Neighbours of our network | Associates of free association |
|---------|---------------------------|--------------------------------|
| bread   | meat cheese toast         | butter dough loaf              |
| butter  | cream cheese flour        | bread margarine milk           |
| milk    | meat cream wine           | cow drink honey                |
| drink   | drinking coffee sleep     | water beer thirst              |
| beer    | wine whisky champagne     | drink wine drunk               |
| wine    | coffee beer champagne     | beer drink dine                |
| drunk   | asleep alone guilty       | alcohol beer drive             |
| drive   | driving walk push         | car fast way                   |
| walk    | walking move run          | run talk stroll                |
| run     | running play move         | walk jog fast                  |
| sleep   | talk drink bed            | dream rest awake               |
| talk    | speak talking leave       | speak listen chatter           |
| leave   | stay talk stop            | come go arrive                 |
| live    | lived stay play           | die life dead                  |
| play    | playing played move       | fun ball game                  |
| move    | turn moved talk           | leave away stay                |
| ball    | shot match straight       | bat round throw                |
| throw   | pull pick push            | ball catch toss                |
| catch   | pick throw pull           | fish throw ball                |
| fish    | animals birds species     | water swim sea                 |
| water   | food light air            | drink cool wet                 |
| food    | material water land       | eat drink hunger               |
| eat     | talk pick lose            | food drink fat                 |
| fat     | sugar butter diet         | skinny thin cat                |

Except the first one, the targets are iteratively chosen from the previous associates or neighbours.

## 2 Details of the protein interaction networks

### 2.1 Properties of $\mathbf{P}$

As mentioned in the main text,  $\mathbf{P}$  represents an un-directional network, which describes the interactions among 4,729 human proteins. The network is characterized by the weighted links of *paifs*. Here we check if the number of links per node still follows a power law distribution like that in the binary protein interaction networks. From Fig. 5 we see that except the tail part, the distribution nearly follows a power law. We suggest that the exception of the tail part is due to the insufficient information on protein interactions we currently know. The highest link number is 221 held by the protein TP53. At another extreme 371 proteins have less than or equal to 3 links, among them 3 proteins have no links above the threshold  $1.0e-5$ .

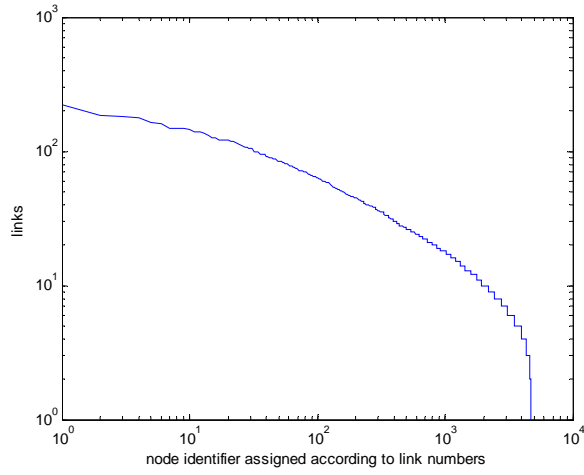

**Figure 5 | The distribution of the link numbers over nodes of P.**

On the other hand, as shown in Fig.6, the *faf* value distribution over links nearly follows a power law in the period from 1 to  $10^4$  with the exponent parameter increasing. The highest *faf* value is 0.086 weighting the link between HPS5 and HPS6 while the lowest *faf* value is equal to the threshold  $1.0e-5$  which is assigned to 67 links. For the interested readers, **P** is available through contact with the corresponding author.

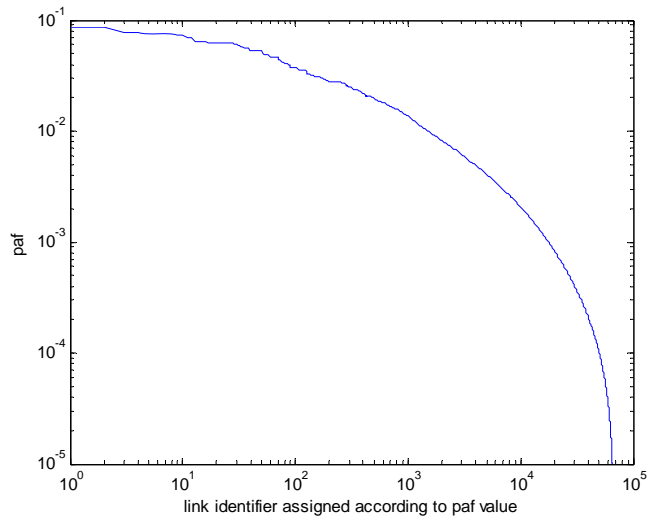

**Figure 6 | The distribution of *faf* values over all links.**

## 2.2 Statistics of the affinity networks of CAPs and CAPCs

Currently, HPRD annotates 77 CAPs, 60 out of them are included in  $\mathbf{P}$ , they are:

AXIN2 PPP2R1B TLR2 BUB1B EP300 AURKA MAD1L1 RAD54B CHEK2 MUTYH  
 AR BAX PTPN12 BRCA2 PMS2 MSH3 PTPRJ KLF6 STK11 EPHB2  
 TSG101 PPARG BARD1 IRF1 IL1B HRAS KRAS SRC TGFBR2 BRAF  
 NRAS PIK3CA PLA2G2A APC PHB RAD51 RB1 ERBB2 ELAC2 RB1CC1  
 XRCC3 MSH6 PALLD BUB1 ATM PTEN CASP10 TP53 CDH1 MSH2  
 MLH1 DCC EGFR FAS FASLG FGFR3 FGFR4 BRCA1 ZFH3 CTNNB1

In order to find the CAPCs (CAP closers) which may be significant in cancer study and connect the CAPs into a whole body, we consider two thresholds  $T_p$  and  $T_a$ , and define that a CAPC have at least  $T_p$  CAPs as its neighbours that each have an affinity to it higher than  $T_a$

Table 3 Distribution of the number of links over the CAPs

| Number of links | Number of proteins | Gene symbol of proteins                                  |
|-----------------|--------------------|----------------------------------------------------------|
| > 19            | 3                  | MSH6(27), ATM(22), RAD51(20)                             |
| 19              | 2                  | FASLG, PHB                                               |
| 18              | 4                  | BRCA1, MSH2, ERBB2, BRCA2                                |
| 15              | 3                  | PTPN12, PTPRJ, CHEK2                                     |
| 14              | 2                  | MLH1, PTEN                                               |
| 12              | 2                  | IRF1, BUB1                                               |
| 11              | 2                  | AR, AXIN2                                                |
| 10              | 3                  | EGFR, BRAF, KLF6                                         |
| 9               | 6                  | RB1, KRAS, EPHB2, AURKA, EP300, MUTYH                    |
| 8               | 3                  | SRC, CDH1, RAD54B                                        |
| 7               | 4                  | FGFR4, NRAS, APC, MAD1L1                                 |
| 6               | 1                  | MSH3                                                     |
| 5               | 4                  | FAS, PIK3CA, TGFBR2, PMS2                                |
| 4               | 5                  | DCC, HRAS, TP53, PPARG, BUB1B                            |
| 3               | 2                  | BARD1, PPP2R1B                                           |
| 2               | 8                  | CTNNB1, FGFR3, BAX, TSG101, CASP10<br>TLR2, XRCC3, PALLD |
| 1               | 4                  | ZFH3, IL1B, PLA2G2A, ELAC2                               |
| 0               | 2                  | STK11, RB1CC1                                            |

By setting  $T_p = 4$  and  $T_a = 0.03$ , 82 CAPCs are identified. Incorporating the CAPCs, 58 CAPs form an integral network with affinities higher than 0.03 (not including the ones between CAPCs). In this network, the number of links of a protein is meaningful. The more links a protein has, the more crucial the protein is for the cancer related protein network. Tables 3 and 4 list the distributions of the number of links over the CAPs and CAPCs respectively. From Table 3, we see that the proteins of MSH6, ATM,



RAD51, FASLG, PHB, BRCA1, MSH2, ERBB2 and BRCA2 are notable for their rich links. Actually, these proteins have just been the ones most frequently referred to in cancer study. Table 4 suggests the important roles of the proteins of FLT1, PTMA, RFC1, FANCD2, BLM and TP53BP1 in the connecting of the network. This information may be significant for study of potential cancer related proteins, while the revealing of other CAPCs is informative as well.

Table 4 Distribution of the number of links over the CAPCs

| Number of links | Number of proteins | Gene symbol of proteins                                                                                                                                                                                                                                                                                                                                        |
|-----------------|--------------------|----------------------------------------------------------------------------------------------------------------------------------------------------------------------------------------------------------------------------------------------------------------------------------------------------------------------------------------------------------------|
| 8               | 2                  | FLT1, PTMA                                                                                                                                                                                                                                                                                                                                                     |
| 7               | 4                  | RFC1, FANCD2, BLM, TP53BP1,                                                                                                                                                                                                                                                                                                                                    |
| 6               | 10                 | JUN, PTPN1, RAP1A, H2AFX, NBN, MDM4<br>RAD50, ERBB2IP, ATR, TREX1                                                                                                                                                                                                                                                                                              |
| 5               | 16                 | EGR1, MUC1, KIT, FER, E2F1, ABL1, HMGA2<br>PTK2, MRE11A, TCF7L2, CHEK1, BUB3<br>VDAC1, PPP1R13L, ING4, MDC1                                                                                                                                                                                                                                                    |
| 4               | 50                 | SELE, ESR1, ERCC5, IFI16, BCR, MIF, CDC25C<br>RELA, NAP1L1, PDGFRB, EPHA2, SOS1, CD28<br>SP1, CEBPB, PDGFB, WEE1, XRCC1, RRAS2<br>MST1R, HNF4A, FEN1, SREBF2, SHC1, TUB<br>PTK2B, DAB2, GRB7, TP73, SATB1, MSH4<br>PLD2, DMC1, DAXX, CCL18, GAB1, WRN<br>TERF2IP, TACC2, SPN, MTA2, CTNNBIP1<br>NEDD9, CNKSR1, ARHGAP17, AATF, 12257*<br>EFCAB6, CALCOCO1, PBK |

\* 12257 is the HPRD ID of the protein, which currently has no official gene symbol.

The cancer related protein affinity network is constructed by the CAPs and CAPCs with 445 affinities (links) higher than 0.03. Whereas the distribution of the affinities is skew rather than even (Fig. 7). The average of the affinities is 0.05, while 200 of them are lower than 0.04 and 44 are higher than 0.08. For readers who are interested in the details of the network, the affinities of the whole network are available in Supplementary Data3.

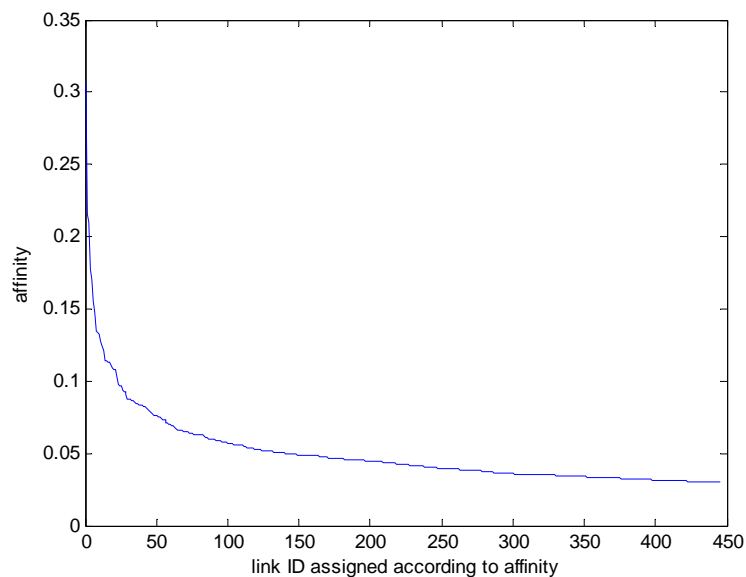

**Figure 7 | The distribution of affinities over the links in the cancer related network.** The sharp fall at the head and the long flat tail are characteristic.

### 2.3 Software for the computation of the protein affinity network

The computation of the protein affinity network can simply be implemented according to the definitions of *pafs* and the affinity measure once the basic statistics of PPIs, i.e. occurrence frequencies, co-occurrence frequencies and close distances, are completed. We provide the program for the basic statistics and the program for the computation of the protein affinity network at the web page of <http://www.pris.net.cn/download/paf>. Readers can also get the programs by sending an email to the corresponding author.
